# Supplementary material
Source: MDPI journal article supplement (https://www.mdpi.com/2673-4095/5/1/5)

# Supplementary materials

|                                                                                             |           |
|---------------------------------------------------------------------------------------------|-----------|
| <b>PICOS</b>                                                                                | <b>2</b>  |
| Table S1: PICOS specified per criterium.                                                    | 2         |
| <b>Quality assessment tool</b>                                                              | <b>3</b>  |
| Table S2: Quality assessment tool (modified QUADAS-2).                                      | 3         |
| Text S1: Rationale behind the modifications to the QUADAS-2 tool                            | 5         |
| <b>Study characteristics</b>                                                                | <b>6</b>  |
| Table S3: Study characteristics of the included studies.                                    | 6         |
| <b>Quality assessment of the included studies</b>                                           | <b>7</b>  |
| Table S4: Quality assessment of the included studies.                                       | 7         |
| <b>Results of individual studies</b>                                                        | <b>8</b>  |
| Table S5.1: Results of individual studies – Primary outcomes.                               | 8         |
| Table S5.2: Results of individual studies – All outcomes.                                   | 9         |
| <b>Study selection</b>                                                                      | <b>10</b> |
| Figure S1: PRISMA flow chart showing study selection from databases and citation searching. | 10        |
| <b>Synthesis of results</b>                                                                 | <b>11</b> |
| Figure S2.1: Forest plot of the sensitivity of AI in rib fracture detection.                | 11        |
| Figure S2.2: Forest plot of the specificity of AI in rib fracture detection.                | 11        |
| Figure S2.3: Forest plot of the Positive Predictive Value (PPV).                            | 12        |
| Figure S2.4: Forest plot of the Negative Predictive Value (NPV).                            | 12        |
| Figure S2.5: Forest plot of the F1-score.                                                   | 13        |
| Figure S2.6: Forest plot comparing directly and indirectly available data                   | 13        |
| <b>Risk of bias across studies</b>                                                          | <b>14</b> |
| Figure S3.1: Funnel plot of the Sensitivity.                                                | 14        |
| Figure S3.2: Funnel plot of the Specificity.                                                | 14        |
| Figure S3.3: Funnel plot of the F1-score.                                                   | 15        |
| Figure S3.4: Funnel plot of the Positive Predictive Value (PPV).                            | 15        |
| Figure S3.5: Funnel plot of the Negative Predictive Value (NPV).                            | 16        |
| Figure S3.6: Assessment of risk of within-study selective reporting.                        | 16        |
| <b>Additional analysis on quality scores</b>                                                | <b>17</b> |
| Figure S4.1: Forest plot of the sensitivity, comparison on domain 1A.                       | 17        |
| Figure S4.2: Forest plot of the sensitivity, comparison on domain 1B.                       | 17        |
| Figure S4.3: Forest plot of the sensitivity, comparison on domain 2A.                       | 18        |

|                                                                                  |    |
|----------------------------------------------------------------------------------|----|
| Figure S4.4: Forest plot of the sensitivity, comparison on domain 2B.            | 18 |
| Figure S4.5: Forest plot of the sensitivity, comparison on domain 3A.            | 19 |
| Figure S4.6: Forest plot of the sensitivity, comparison on domain 3B.            | 19 |
| Figure S4.7: Forest plot of the sensitivity, comparison on domain 4.             | 20 |
| Figure S4.8: Forest plot of the specificity, comparison on domain 1A.            | 20 |
| Figure S4.9: Forest plot of the specificity, comparison on domain 1B.            | 21 |
| Figure S4.10: Forest plot of the specificity, comparison on domain 2A.           | 21 |
| Figure S4.11: Forest plot of the specificity, comparison on domain 2B.           | 22 |
| Figure S4.12: Forest plot of the specificity, comparison on domain 3A.           | 22 |
| Figure S4.13: Forest plot of the specificity, comparison on domain 3B.           | 23 |
| Figure S4.14: Forest plot of the specificity, comparison on domain 4.            | 23 |
| Figure S4.15: Forest plot of the sensitivity, comparison based on quality score. | 24 |

## PICOS

*Table S1: PICOS specified per criterium.*

| <b>Criterium</b>          | <b>Description</b>                                                                                                                                                    |
|---------------------------|-----------------------------------------------------------------------------------------------------------------------------------------------------------------------|
| P: Population of interest | CT scans or thoracic X-rays of patients, that were analyzed for the presence of rib fractures by at least 2 radiologists, which was stated as the reference standard. |
| I: Intervention           | Diagnostic detection by an artificial intelligence tool on its own                                                                                                    |
| C: Comparison             | All comparisons                                                                                                                                                       |
| O: Outcome                | Number of true positives, true negatives, false positives, and false negatives and/or the sensitivity, and specificity                                                |
| S: Study type             | Diagnostic case-control studies, diagnostic cohort studies, and diagnostic RCTs                                                                                       |

## Quality assessment tool

Table S2: Quality assessment tool (modified QUADAS-2) [15].

### DOMAIN 1: PATIENT SELECTION

#### *A. Risk of Bias*

- |                                                            |                       |
|------------------------------------------------------------|-----------------------|
| ❖ Was a consecutive or random sample of patients enrolled? | Yes<br>No<br>Unclear  |
| ❖ Was a case-control design avoided?                       | Yes<br>No<br>Unclear  |
| ❖ Did the study avoid inappropriate exclusions?            | Yes,<br>No<br>Unclear |

|                                                       |                                     |
|-------------------------------------------------------|-------------------------------------|
| Could the selection of patients have introduced bias? | RISK:<br><br>LOW<br>HIGH<br>UNCLEAR |
|-------------------------------------------------------|-------------------------------------|

#### *B. Concerns regarding applicability*

|                                                                               |                                        |
|-------------------------------------------------------------------------------|----------------------------------------|
| Is there concern that the included patients do not match the review question? | CONCERN:<br><br>LOW<br>HIGH<br>UNCLEAR |
|-------------------------------------------------------------------------------|----------------------------------------|

### DOMAIN 2: INDEX TEST(S)

#### *A. Risk of Bias*

- |                                                |                      |
|------------------------------------------------|----------------------|
| ❖ Was the AI trained on a multicenter dataset? | Yes<br>No<br>Unclear |
|------------------------------------------------|----------------------|

|                                                                             |                                     |
|-----------------------------------------------------------------------------|-------------------------------------|
| Could the conduct or interpretation of the index test have introduced bias? | RISK:<br><br>LOW<br>HIGH<br>UNCLEAR |
|-----------------------------------------------------------------------------|-------------------------------------|

#### *B. Concerns regarding applicability*

|                                                                                                       |                                        |
|-------------------------------------------------------------------------------------------------------|----------------------------------------|
| Is there concern that the index test, its conduct, or interpretation differ from the review question? | CONCERN:<br><br>LOW<br>HIGH<br>UNCLEAR |
|-------------------------------------------------------------------------------------------------------|----------------------------------------|

### DOMAIN 3: REFERENCE STANDARD

#### *A. Risk of Bias*

❖ Is the reference standard likely to correctly classify the target condition?

Yes  
No  
Unclear

❖ Were the reference standard results interpreted without knowledge of the results of the index test?

Yes  
No  
Unclear

Could the reference standard, its conduct, or its interpretation have introduced bias?

RISK:  
LOW  
HIGH  
UNCLEAR

#### *B. Concerns regarding applicability*

Is there concern that the target condition as defined by the reference standard does not match the review question?

CONCERN:  
LOW  
HIGH  
UNCLEAR

### DOMAIN 4: FLOW AND TIMING

#### *A. Risk of Bias*

❖ Did all patients receive a reference standard?

Yes  
No  
Unclear

❖ Did patients receive the same reference standard?

Yes  
No  
Unclear

❖ Were all patients included in the analysis?

Yes  
No  
Unclear

Could the patient flow have introduced bias?

RISK:  
LOW  
HIGH  
UNCLEAR

*Text S1: Rationale behind the modifications to the QUADAS-2 tool*

- We deleted the guiding question in domain 2A “Were the index test results interpreted without knowledge of the results of the reference standard?”, as the AI was only trained to process visual data provided through a CT scan, and as the exact same CT scan was assessed by the reference standard. Thus, we deemed that there was a very small chance of reference standard having influenced the AI.
- We deleted the guiding question in domain 2A “If a threshold was used, was it pre-specified?”, as thresholds were irrelevant to our research question.
- We added the guiding question in domain 2A “Was the AI trained on a multicenter dataset?” as training on multiple centers would decrease the chance of the AI containing bias and decrease the chance of it being overfitted.
- We deleted the guiding question in domain 4 “Was there an appropriate interval between index test(s) and reference standard?”, as a time interval would not have influenced the CT and therefore would not have influenced the diagnostic accuracy of either the reference standard or the index test.

## Study characteristics

Table S3: Study characteristics of the included studies.

The amount of included patients and included CT scans was deemed as being the same, as we believe that the large majority of included patients underwent a single CT scan.

| Author, year             | Number of patients or CT scans in dataset | Input features | Reference standard                                                                                                                                                    | Comparisons                                                                                                                                                                                | Relevant outcomes                            | Type of study                                           | Quality |
|--------------------------|-------------------------------------------|----------------|-----------------------------------------------------------------------------------------------------------------------------------------------------------------------|--------------------------------------------------------------------------------------------------------------------------------------------------------------------------------------------|----------------------------------------------|---------------------------------------------------------|---------|
| Gipson et al., 2022 [28] | 1400                                      | CT             | Contemporaneous CT reports                                                                                                                                            | Comparison with reference standard and performance of radiologists using the AI tool                                                                                                       | Sensitivity, specificity, TP, FN, FP, and TN | Retrospective diagnostic cohort study                   | High    |
| Jin et al., 2020 [27]    | 120                                       | CT             | Five radiologists of 3 to 20 years of experience.                                                                                                                     | Comparison with different AI tools                                                                                                                                                         | Sensitivity                                  | Retrospective diagnostic cohort study                   | High    |
| Kaiume et al., 2021 [26] | 39                                        | CT             | Two radiologists with 26 and 6 years of image interpretation experience                                                                                               | Diagnostic performance rib fractures of two intern doctors                                                                                                                                 | Sensitivity                                  | Retrospective diagnostic cohort study                   | High    |
| Niiya et al., 2022 [25]  | 56                                        | CT             | Two radiologists with 6 and 9 years of experience.                                                                                                                    | Comparison with reference standard                                                                                                                                                         | Sensitivity                                  | Retrospective diagnostic case-control study             | High    |
| Wang et al., 2022 [24]   | 1613                                      | CT             | Two radiologists with at least 9 years of experience and in case of inconclusion they made consensus with a senior radiologists with at least 20 years of experience. | Comparison with six attending radiologists                                                                                                                                                 | Sensitivity, and specificity                 | Retrospective diagnostic case-control study             | High    |
| Wu et al., 2021 [23]     | 105                                       | CT             | Three radiologists with 6, 10, and 14 years of experience and one senior radiologist with 18 years of experience.                                                     | Comparison radiologists who used AI to diagnose                                                                                                                                            | Sensitivity                                  | Retrospective diagnostic case-control study             | High    |
| Yang et al., 2022 [21]   | 120                                       | CT             | Two experienced musculoskeletal radiologists with at least 10 years of experience and a third radiologist was invited to participate if there was a discussion.       | Comparison with the diagnosis of three radiologists, with 5, 7 and 21 years of experience. Those radiologists were not the same as the radiologists who determined the reference standard. | Sensitivity, TP, FP, TN, and FN              | Retrospective diagnostic cohort study                   | High    |
| Yao et al., 2021 [22]    | 100                                       | CT             | Three experienced radiologists (over 10 years experience) and checking by two senior radiologists (over 15 years experience).                                         | Comparison of the performance between AI, radiologist and radiologic-AI collaboration                                                                                                      | Sensitivity                                  | Retrospective diagnostic cohort study                   | High    |
| Zhou et al., 2020 [20]   | 30                                        | CT             | Two experienced musculoskeletal radiologists with 8 and 9 years of experience and two senior radiologists with 20 and 14 years of experience. If the                  | Comparison with the performance of five attending radiologists with 6–8 years of experience. There was no overlap between                                                                  | Sensitivity, and FP                          | Multicentre retrospective diagnostic case-control study | High    |

|                         |                                              |    |                                                                                                                                                                                             |                                                                                                                                                                               |                              |                                                   |              |
|-------------------------|----------------------------------------------|----|---------------------------------------------------------------------------------------------------------------------------------------------------------------------------------------------|-------------------------------------------------------------------------------------------------------------------------------------------------------------------------------|------------------------------|---------------------------------------------------|--------------|
|                         |                                              |    | conclusion was inconsistent, one thoracic surgeon was invited to participate in the discussion.                                                                                             | those radiologists and the radiologists who determined the reference standard.                                                                                                |                              |                                                   |              |
| Zhou et al., 2021 [17]  | 260                                          | CT | Two experienced musculoskeletal radiologists with 8 and 9 years of experience, two senior radiologists with 20 and 14 years of experience and one thoracic surgeon in case of inconclusion. | Five radiologists with 6 to 8 years of experience with no overlap with the radiologists who determined the reference standard                                                 | Sensitivity, and specificity | Multicentre retrospective diagnostic cohort study | High         |
| Zhou et al., 2022 [18]  | 164                                          | CT | Two musculoskeletal radiologists with five years of experience and one senior musculoskeletal radiologist with more than ten years of experience.                                           | Comparison with different AI tools                                                                                                                                            | Sensitivity                  | Retrospective diagnostic cohort study             | Intermediate |
| Zhou et al., 2022. [19] | Internal dataset: 90<br>External dataset: 38 | CT | Two experienced musculoskeletal radiologists (9 and 10 years of experience), two senior radiologists (21 and 15 years of experience) and in doubt one thoracic surgeon.                     | Comparison with the diagnosis of five radiologists with 7–9 years of CT diagnosis experience which were different from the radiologists who determined the reference standard | Sensitivity, TP, FN. and FP  | Multicentre retrospective diagnostic cohort study | Intermediate |

## Quality assessment of the included studies

Table S4: Quality assessment of the included studies.

| Author, year             | Researchers    | Patient selection |    | Index test |    | Reference test |    | Flow and timing | Score | Quality      |
|--------------------------|----------------|-------------------|----|------------|----|----------------|----|-----------------|-------|--------------|
|                          |                | 1A                | 1B | 2A         | 2B | 3A             | 3B |                 |       |              |
| Gipson et al., 2022 [28] | MCL, JH, (LFM) | 1                 | 1  | 1          | 1  | 0              | 1  | 1               | 6     | High         |
| Jin et al., 2020 [27]    | LFM, JH, (MCL) | 0                 | 1  | 1          | 0  | 1              | 1  | 1               | 5     | High         |
| Kaiume et al., 2021 [26] | LFM, JH, (MCL) | 1                 | 1  | 1          | 1  | 1              | 0  | 1               | 6     | High         |
| Niiya et al., 2022 [25]  | MCL, LFM, (JH) | 0                 | 1  | 1          | 1  | 1              | 1  | 1               | 6     | High         |
| Wang et al., 2022 [24]   | LFM, JH, (MCL) | 1                 | 1  | 1          | 1  | 1              | 1  | 1               | 7     | High         |
| Wu et al., 2021 [23]     | LFM, JH, (MCL) | 1                 | 1  | 1          | 1  | 0              | 1  | 1               | 6     | High         |
| Yang et al., 2022 [21]   | LFM, MCL, (JH) | 1                 | 1  | 1          | 1  | 1              | 1  | 1               | 7     | High         |
| Yao et al., 2021 [22]    | LFM, JH, (MCL) | 1                 | 1  | 1          | 1  | 1              | 1  | 1               | 7     | High         |
| Zhou et al., 2020 [20]   | MCL, JH, (LFM) | 0                 | 1  | 1          | 1  | 1              | 1  | 1               | 6     | High         |
| Zhou et al., 2021 [17]   | LFM, MCL, (JH) | 1                 | 0  | 1          | 0  | 1              | 1  | 1               | 5     | High         |
| Zhou et al., 2022 [18]   | LFM, JH, (MCL) | 0                 | 0  | 0          | 1  | 1              | 1  | 1               | 4     | Intermediate |
| Zhou et al., 2022. [19]  | MCL, LFM, (JH) | 0                 | 0  | 1          | 1  | 1              | 0  | 1               | 4     | Intermediate |

## Results of individual studies

Table S5.1: Results of individual studies – Primary outcomes.

- Data was not available directly and could not be calculated.

*Italic data* has been calculated using other data.

\* Estimated using the set of assumptions.

| Author, year             | Dataset             | Total fractures | TP, FP, FN, TN         | Sensitivity         | Specificity         |
|--------------------------|---------------------|-----------------|------------------------|---------------------|---------------------|
| Gipson et al., 2022 [28] | -                   | 348             | 143, 75, 205, 977      | 0.411 (0,359–0,465) | 0.929 (0.912–0.944) |
| Jin et al., 2020 [27]    | Test cohort         | 882             | 819, 632, 63, -        | 0.929               | -                   |
| Kaiume et al., 2021 [26] | Validation dataset  | 256             | 165, 43, 91, 637*      | 0.645 (0,586–0,703) | 0.937               |
| Niiya et al., 2022 [25]  | Evaluation dataset  | 199             | 186, 106, 13, 1039*    | 0.935               | 0.907*              |
| Wang et al., 2022 [24]   | Internal dataset    | 2096            | 1915, 788, 181, 36188* | 0.914 (0.901–0.925) | 0.979*              |
| Wang et al., 2022 [24]   | External dataset    | 4144            | 3521, 565, 623, 34003* | 0.850 (0.838–0.860) | 0.984*              |
| Wu et al., 2021 [23]     | Test 1              | 1545            | -                      | -                   | -                   |
| Wu et al., 2021 [23]     | Test 2              | 491             | 417, 90, 75, -         | 0.849 (0.803–0.867) | 0.872 (0.825–0.887) |
| Wu et al., 2021 [23]     | Test 3              | -               | -                      | -                   | -                   |
| Yang et al., 2022 [21]   | Cohort 1            | 2856            | -                      | -                   | -                   |
| Yang et al., 2022 [21]   | Cohort 2            | 397             | 366, 122, 31, 2361*    | 0.9219              | 0.951*              |
| Yang et al., 2022 [21]   | Cohort 3            | 309             | 288, 21, 111, 1470*    | 0.932               | 0.986*              |
| Yao et al., 2021 [22]    | Testing set         | 436             | 398, 60, 38, 1188      | 0.913               | 0.952               |
| Zhou et al., 2020 [20]   | Validation Set      | 494             | 417, 134, 77, -        | 0.845               | -                   |
| Zhou et al., 2021 [17]   | Validation set      | 525             | -                      | -                   | -                   |
| Zhou et al., 2022 [18]   | Test set            | 627             | 510, -, 117, -         | 0.8128              | -                   |
| Zhou et al., 2022. [19]  | Testing dataset     | 427             | 391, 45, 36, 1672*     | 0.916               | 0.974*              |
| Zhou et al., 2022. [19]  | External dataset    | 163             | 153, 32, 10, -         | 0.939               | -                   |
| Zhou et al., 2022. [19]  | Competition dataset | 241             | 217, 23, 24, 808*      | 0.900               | 0.972*              |



Table S5.2: Results of individual studies – All outcomes.

\* Estimated using the set of assumptions

- Data was not available directly and could not be calculated.

*Italic data* has been calculated using other data

| Author, year             | Dataset             | Year | TP   | FP  | FN  | TN     | Total positives | Total negatives | Total non-fractures | Total rib fractures | Sensitivity | Specificity | F1-score | PPV   | NPV    | Time   |
|--------------------------|---------------------|------|------|-----|-----|--------|-----------------|-----------------|---------------------|---------------------|-------------|-------------|----------|-------|--------|--------|
| Gipson et al., 2022 [28] | -                   | 2022 | 143  | 75  | 205 | 977    | 218             | 1182            | 1052                | 348                 | 0.411       | 0.929       | 0.505    | 0.656 | 0.827  | -      |
| Jin et al., 2020 [27]    | Test cohort         | 2020 | 819  | 632 | 63  | -      | 1451            | -               | -                   | 882                 | 0.929       | -           | 0.702    | 0.564 | -      | 31     |
| Kaiume et al., 2021 [26] | Validation dataset  | 2021 | 165  | 43  | 91  | 637*   | 208             | 728*            | 680*                | 256                 | 0.645       | 0.937       | 0.711    | 0.793 | 0.875* | -      |
| Niiya et al., 2022 [25]  | Evaluation dataset  | 2022 | 186  | 106 | 13  | 1039*  | 292             | 1052*           | 1145*               | 199                 | 0.935       | 0.907*      | 0.758    | 0.637 | 0.988* | -      |
| Wang et al., 2022 [24]   | Internal dataset    | 2022 | 1915 | 788 | 181 | 36188* | 2703            | 36369*          | 36976*              | 2096                | 0.914       | 0.979*      | 0.798    | 0.708 | 0.995* | -      |
| Wang et al., 2022 [24]   | External dataset    | 2022 | 3521 | 565 | 623 | 34003* | 4086            | 34626*          | 34568               | 4144                | 0.850       | 0.984*      | 0.856    | 0.862 | 0.982* | -      |
| Wu et al., 2021 [23]     | Test 1              | 2021 | -    | -   | -   | -      | -               | -               | -                   | 1545                | -           | -           | -        | -     | -      | -      |
| Wu et al., 2021 [23]     | Test 2              | 2021 | 417  | 90  | 75  | -      | 507             | -               | -                   | 491                 | 0.849       | 0.872       | 0.833    | 0.822 | -      | -      |
| Wu et al., 2021 [23]     | Test 3              | 2021 | -    | -   | -   | -      | -               | -               | -                   | -                   | -           | -           | -        | -     | -      | -      |
| Yang et al., 2022 [21]   | Cohort 1            | 2022 | -    | -   | -   | -      | -               | -               | -                   | 2856                | -           | -           | -        | -     | -      | -      |
| Yang et al., 2022 [21]   | Cohort 2            | 2022 | 366  | 122 | 31  | 2361*  | 488             | 2392*           | 2483*               | 397                 | 0.9219      | 0.951*      | 0.8271   | 0.750 | 0.987* | 49.13  |
| Yang et al., 2022 [21]   | Cohort 3            | 2022 | 288  | 21  | 111 | 1470*  | 309             | 1581*           | 1491*               | 309                 | 0.932       | 0.986*      | 0.8135   | 0.932 | 0.930* | 50.29  |
| Yao et al., 2021 [22]    | Testing set         | 2021 | 398  | 60  | 38  | 1188   | 458             | 1226            | 1248                | 436                 | 0.913       | 0.952       | 0.890    | 0.869 | 0.969  | 20     |
| Zhou et al., 2020 [20]   | Validation Set      | 2020 | 417  | 134 | 77  | -      | 551             | -               | -                   | 494                 | 0.845       | -           | 0.798    | 0.757 | -      | -      |
| Zhou et al., 2021 [17]   | Validation set      | 2021 | -    | -   | -   | -      | -               | -               | -                   | 525                 | -           | -           | -        | -     | -      | -      |
| Zhou et al., 2022 [18]   | Test set            | 2022 | 510  | -   | 117 | -      | -               | -               | -                   | 627                 | 0.8128      | -           | -        | -     | -      | -      |
| Zhou et al., 2022. [19]  | Testing dataset     | 2022 | 391  | 45  | 36  | 1672*  | 436             | 1708*           | 1717*               | 427                 | 0.916       | 0.974*      | 0.906    | 0.897 | 0.979* | -      |
| Zhou et al., 2022. [19]  | External dataset    | 2022 | 153  | 32  | 10  | -      | 185             | -               | -                   | 163                 | 0.939       | -           | 0.879    | 0.827 | -      | -      |
| Zhou et al., 2022. [19]  | Competition dataset | 2022 | 217  | 23  | 24  | 808*   | 240             | 831*            | 831*                | 241                 | 0.900       | 0.972*      | 0.902    | 0.904 | 0.971* | 12.638 |

## Study selection

Figure S1: PRISMA flow chart showing study selection from databases and citation searching.

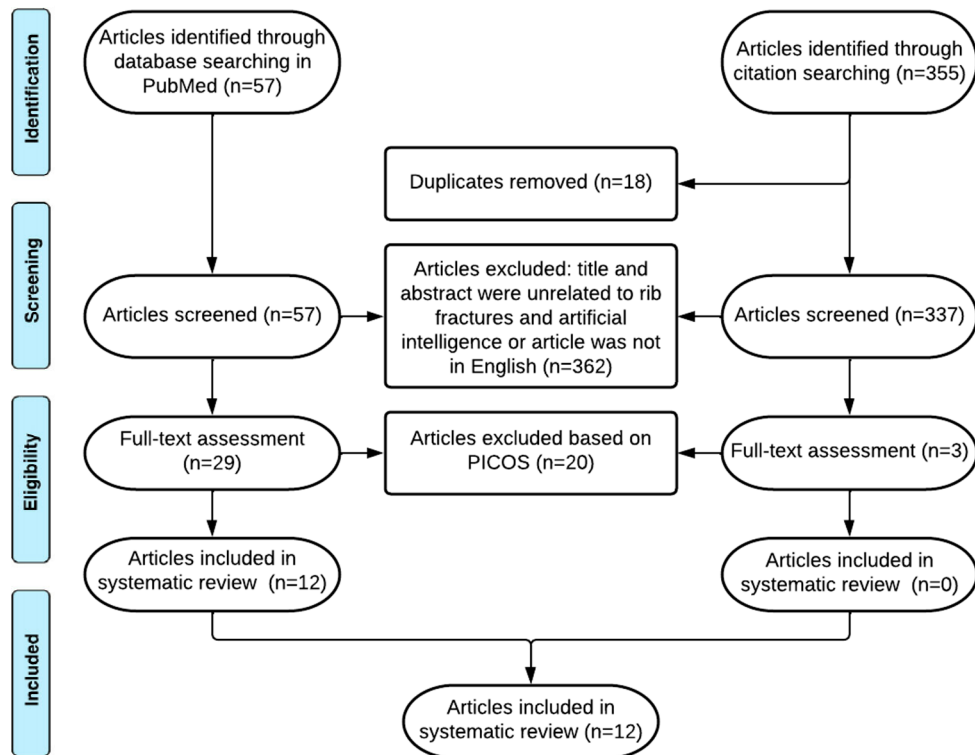

## Synthesis of results

Figure S2.1: Forest plot of the sensitivity of AI in rib fracture detection [18–28].

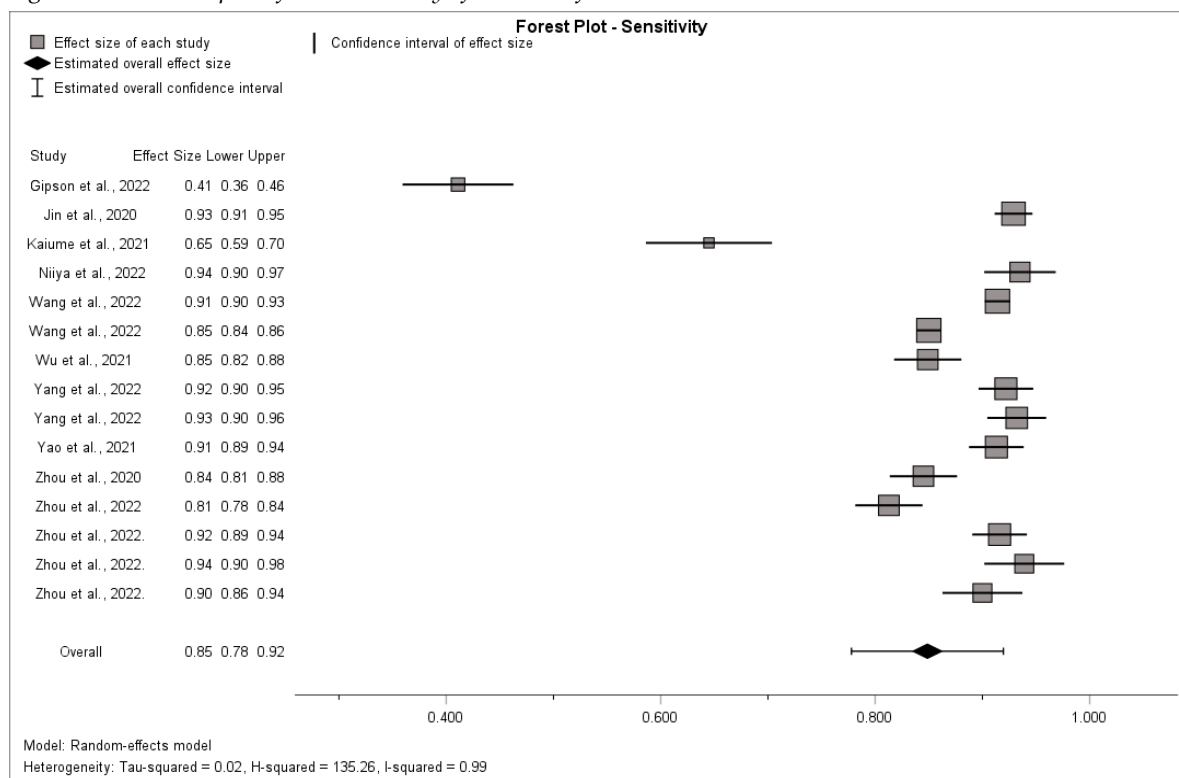

Figure S2.2: Forest plot of the specificity of AI in rib fracture detection [19,21,22,24–26,28].

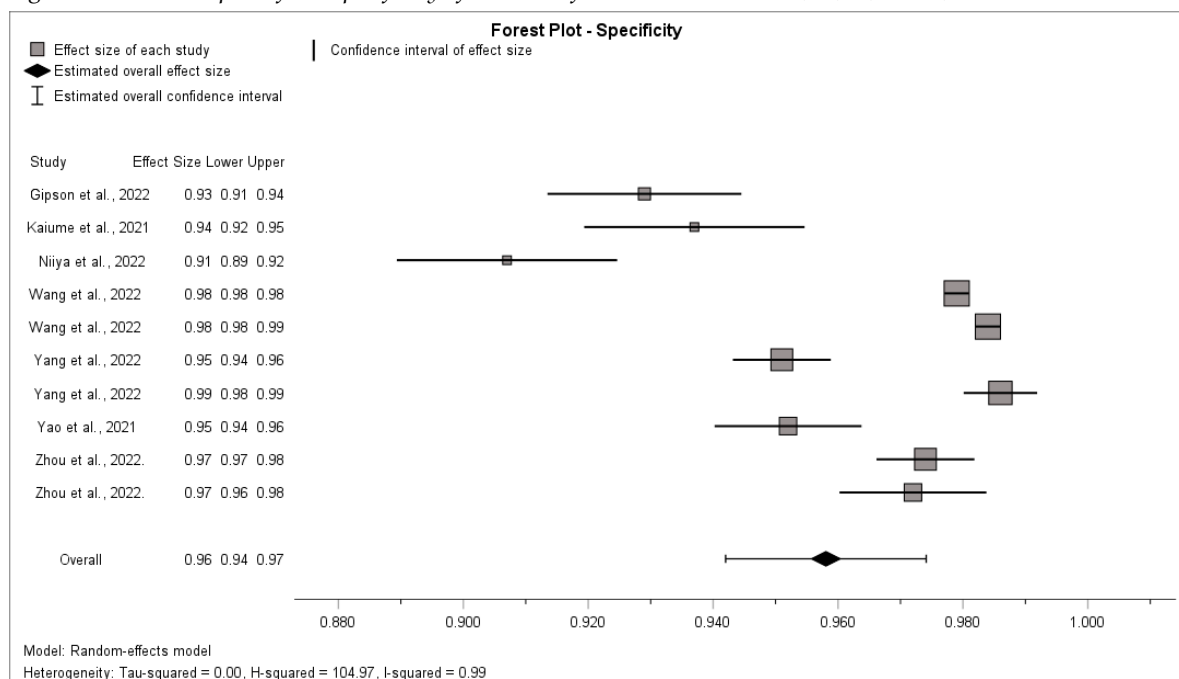

Figure S2.3: Forest plot of the Positive Predictive Value (PPV) [19–28].

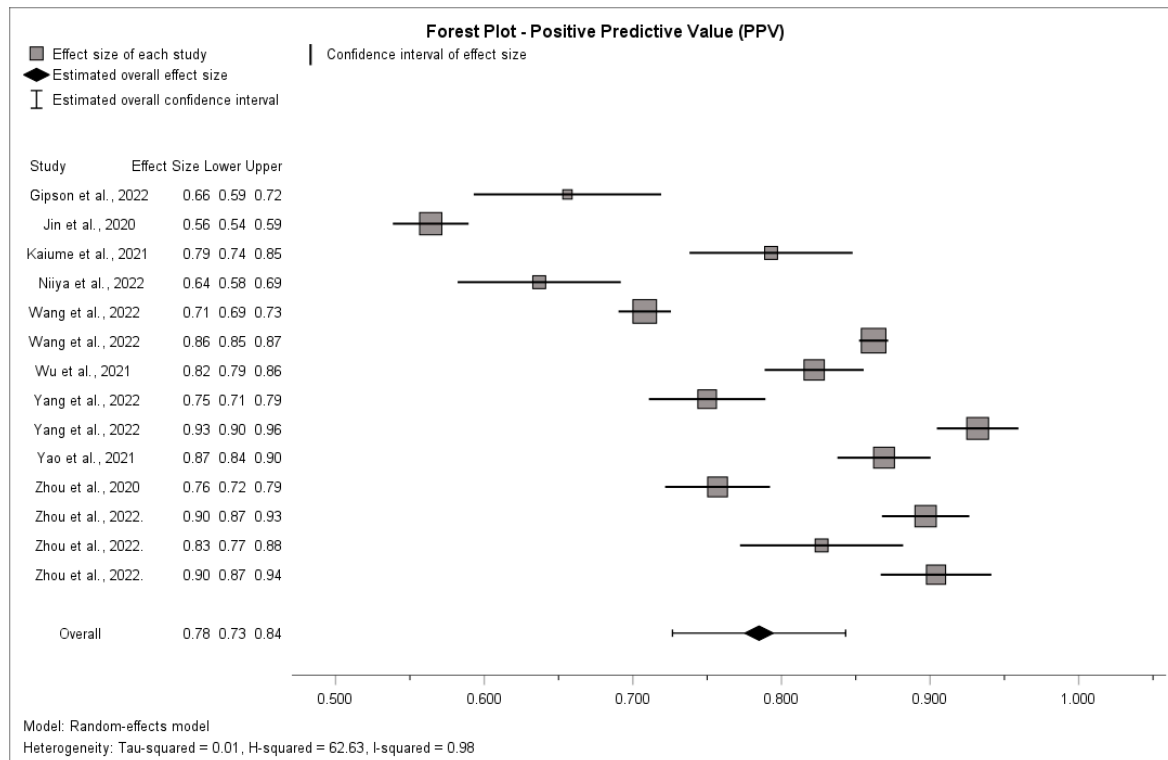

Figure S2.4: Forest plot of the Negative Predictive Value (NPV) [19,21–22,24–26,28].

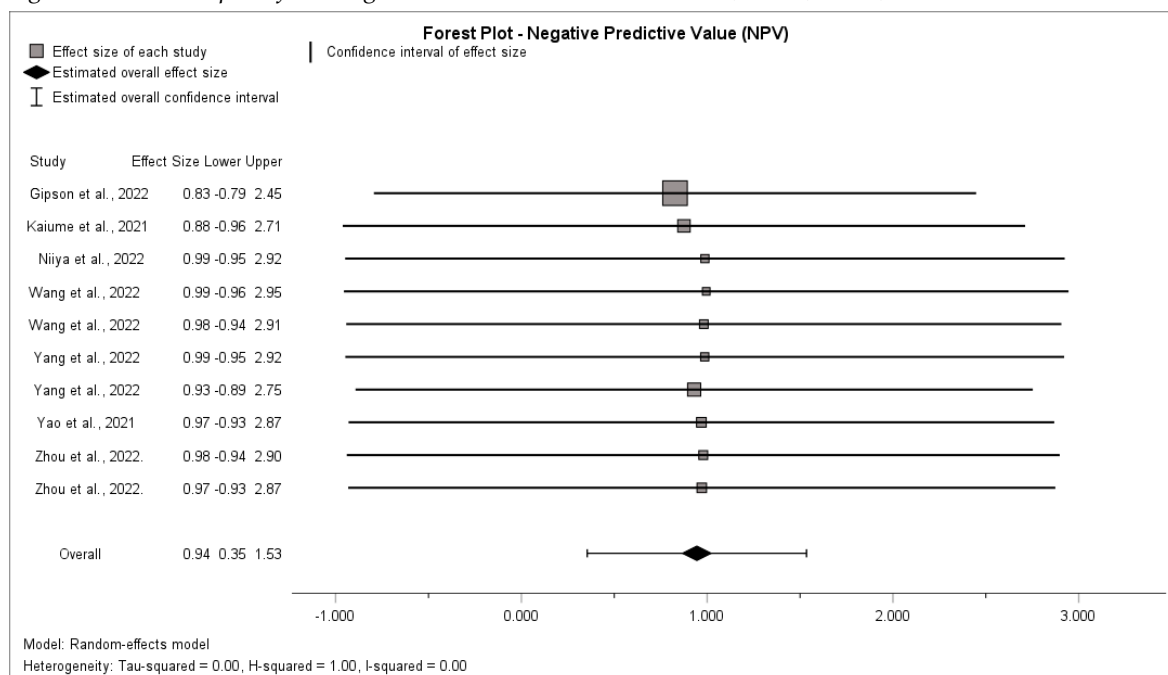

Figure S2.5: Forest plot of the F1-score [19–28].

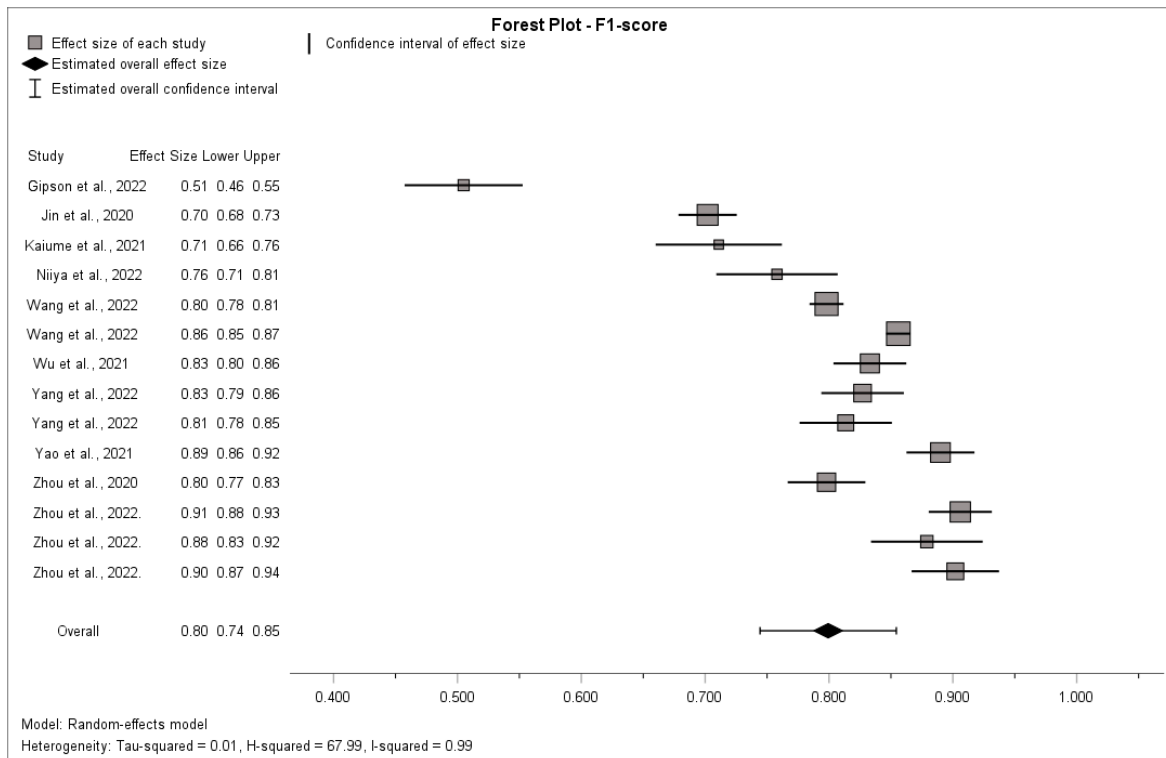

Figure S2.6: Forest plot comparing directly and indirectly available data [19,21,22,24–26,28].

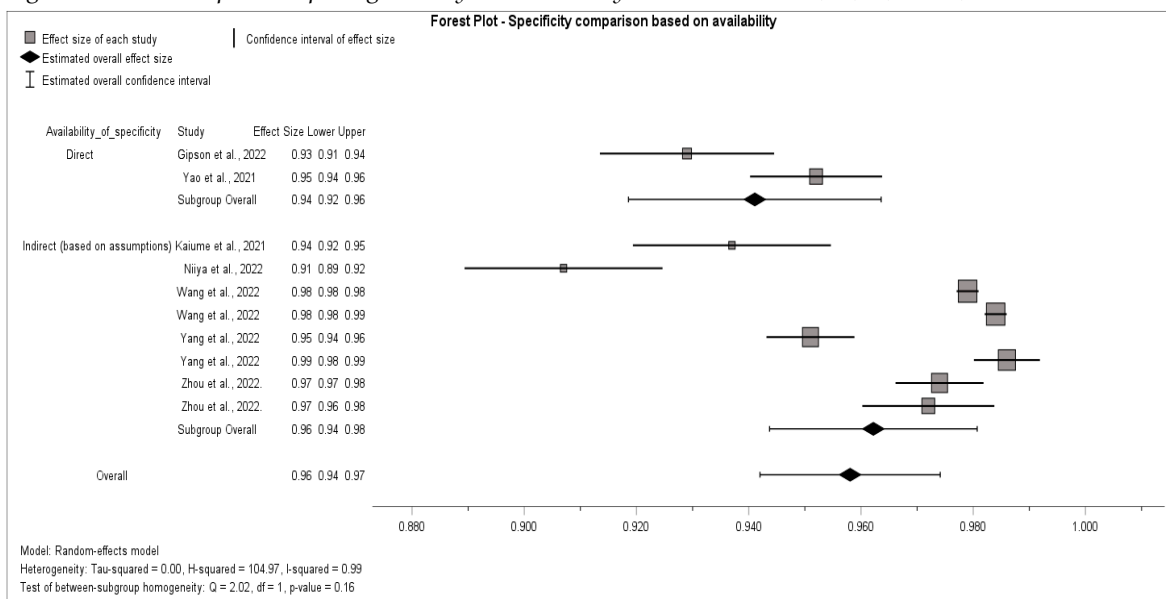

## Risk of bias across studies

Figure S3.1: Funnel plot of the Sensitivity [18–28].

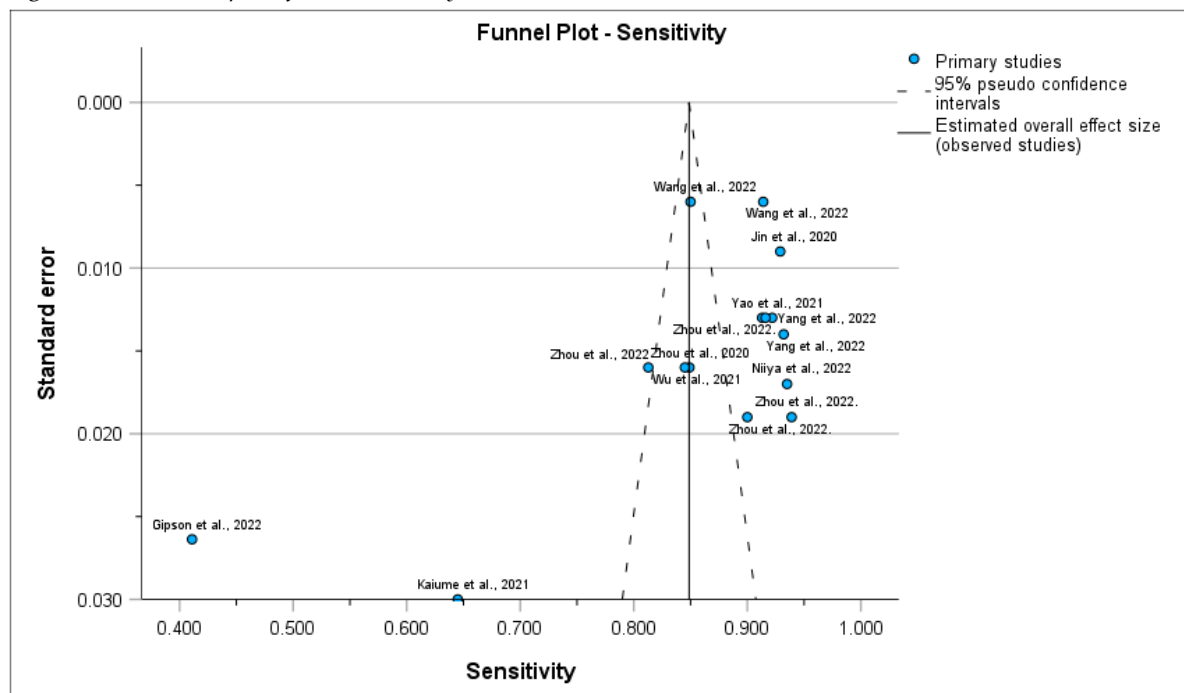

Figure S3.2: Funnel plot of the Specificity [19,21,22,24–26,28].

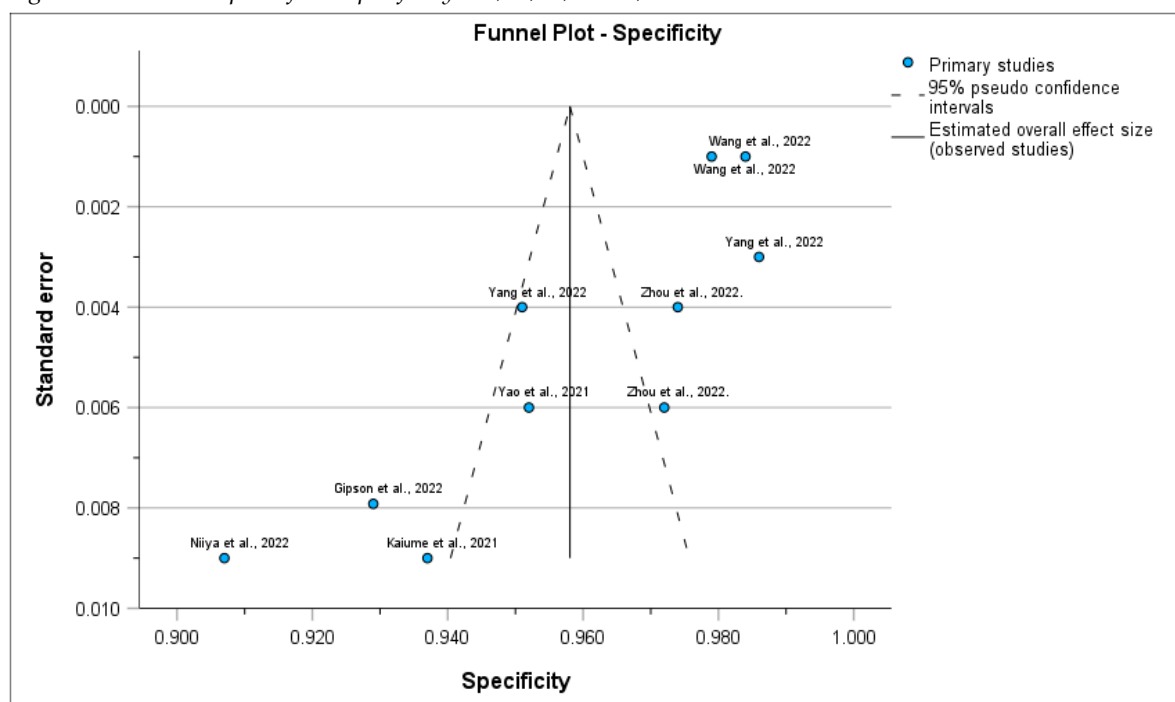

Figure S3.3: Funnel plot of the F1-score [19–28].

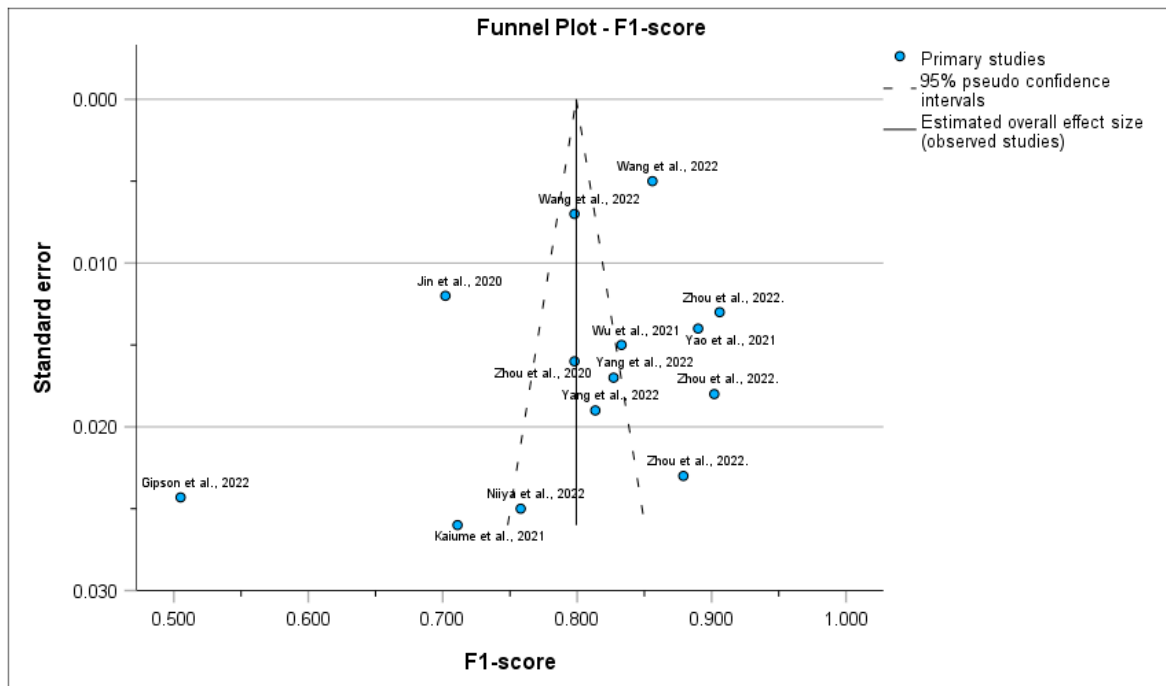

Figure S3.4: Funnel plot of the Positive Predictive Value (PPV) [19–28].

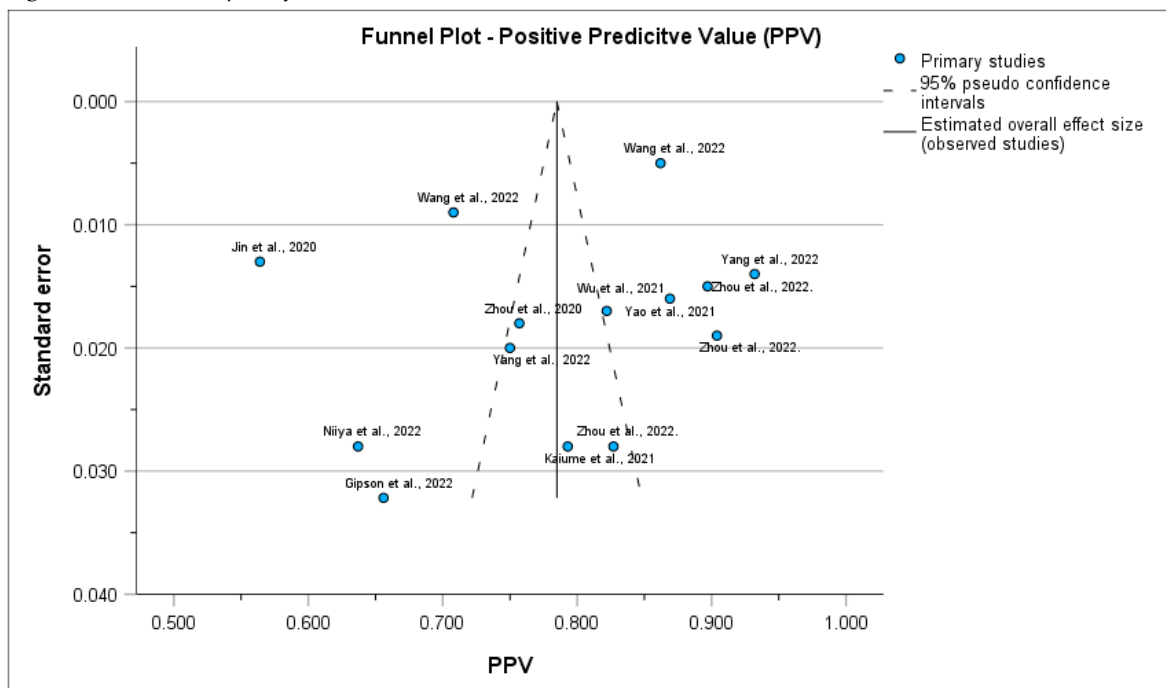

Figure S3.5: Funnel plot of the Negative Predictive Value (NPV) [19,21–22,24–26,28].

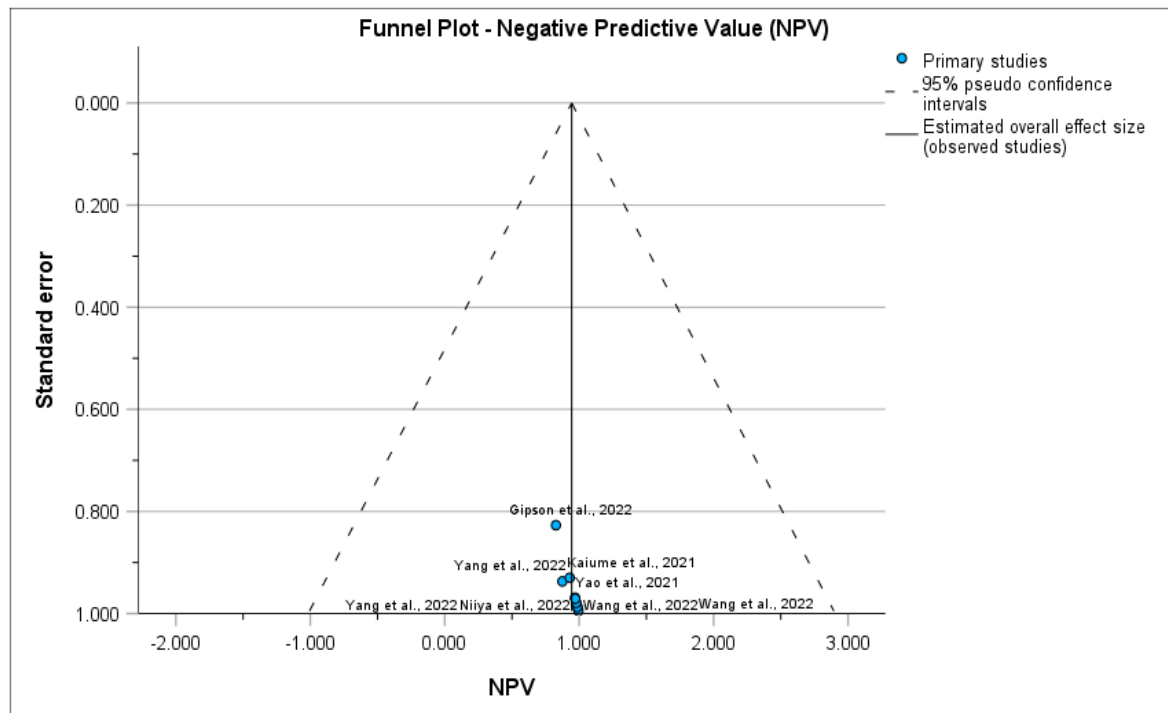

Figure S3.6: Assessment of risk of within-study selective reporting.

| Author, year             | Relevant outcomes stated in methods          | Outcomes also reported as result?                            | Score | Risk of within-study selective reporting |
|--------------------------|----------------------------------------------|--------------------------------------------------------------|-------|------------------------------------------|
| Gipson et al., 2022 [28] | Sensitivity, specificity, TP, FN, FP, and TN | Yes                                                          | 0     | Low                                      |
| Jin et al., 2020 [27]    | Sensitivity                                  | Yes                                                          | 0     | Low                                      |
| Kaiume et al., 2021 [26] | Sensitivity                                  | Yes                                                          | 0     | Low                                      |
| Niiya et al., 2022 [25]  | Sensitivity                                  | Yes                                                          | 0     | Low                                      |
| Wang et al., 2022 [24]   | Sensitivity, and specificity                 | Yes (specificity was given, but not on a per-fracture level) | 0     | Low                                      |
| Wu et al., 2021 [23]     | Sensitivity                                  | Yes                                                          | 0     | Low                                      |
| Yang et al., 2022 [21]   | Sensitivity, TP, FP, TN, and FN              | Yes                                                          | 0     | Low                                      |
| Yao et al., 2021 [22]    | Sensitivity                                  | Yes                                                          | 0     | Low                                      |
| Zhou et al., 2020 [20]   | Sensitivity and FP                           | Yes                                                          | 0     | Low                                      |
| Zhou et al., 2021 [17]   | Sensitivity and specificity                  | Yes (but not per-fracture level)                             | 0     | Low                                      |
| Zhou et al., 2022 [18]   | Sensitivity                                  | Yes                                                          | 0     | Low                                      |
| Zhou et al., 2022. [19]  | Sensitivity, TP, FN, and FP                  | Yes (but not per-fracture level)                             | 0     | Low                                      |



## Additional analysis on quality scores

Figure S4.1: Forest plot of the sensitivity, comparison on domain 1A [18–28].

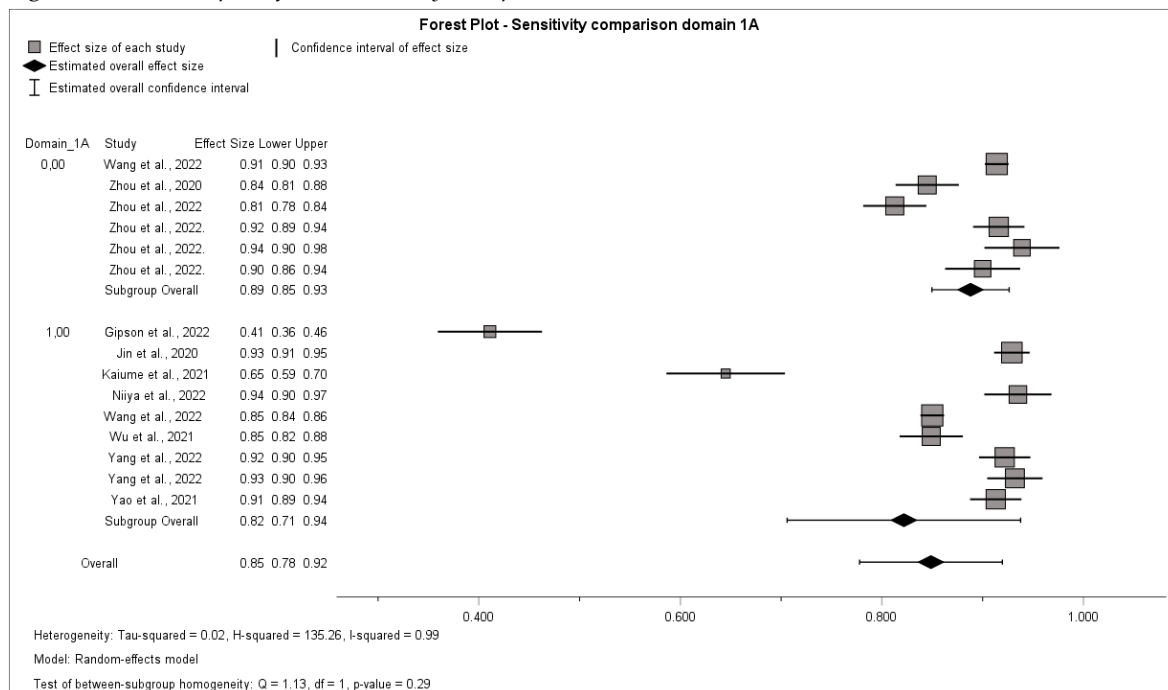

Figure S4.2: Forest plot of the sensitivity, comparison on domain 1B [18–28].

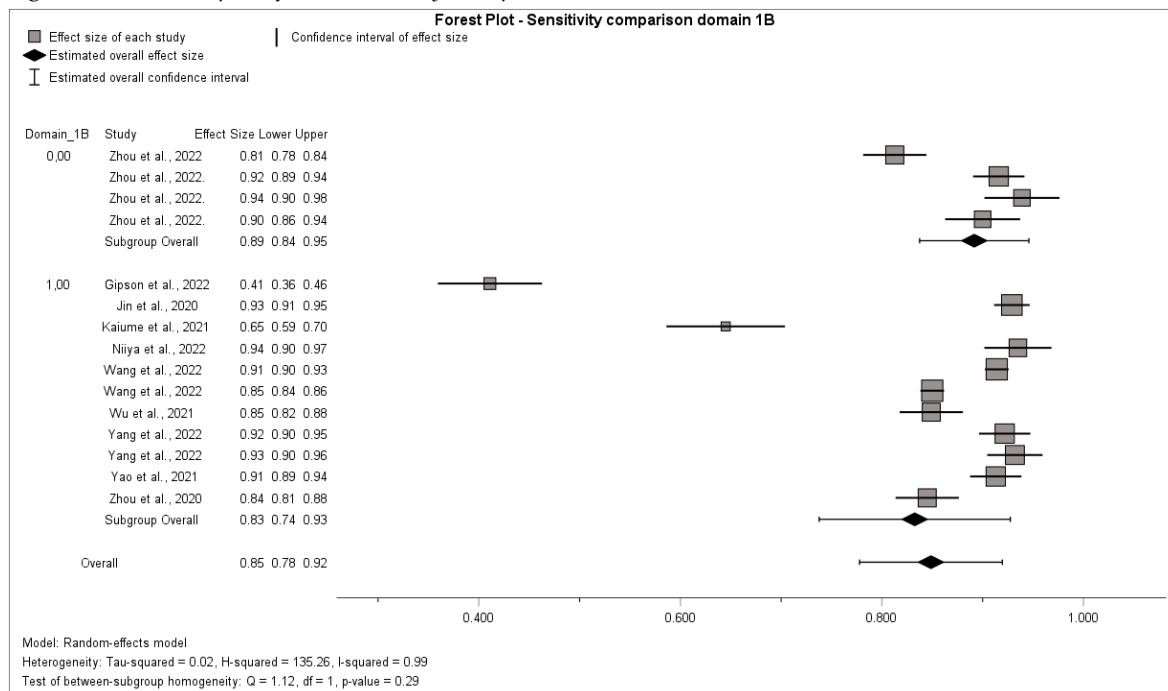

Figure S4.3: Forest plot of the sensitivity, comparison on domain 2A [18–28].

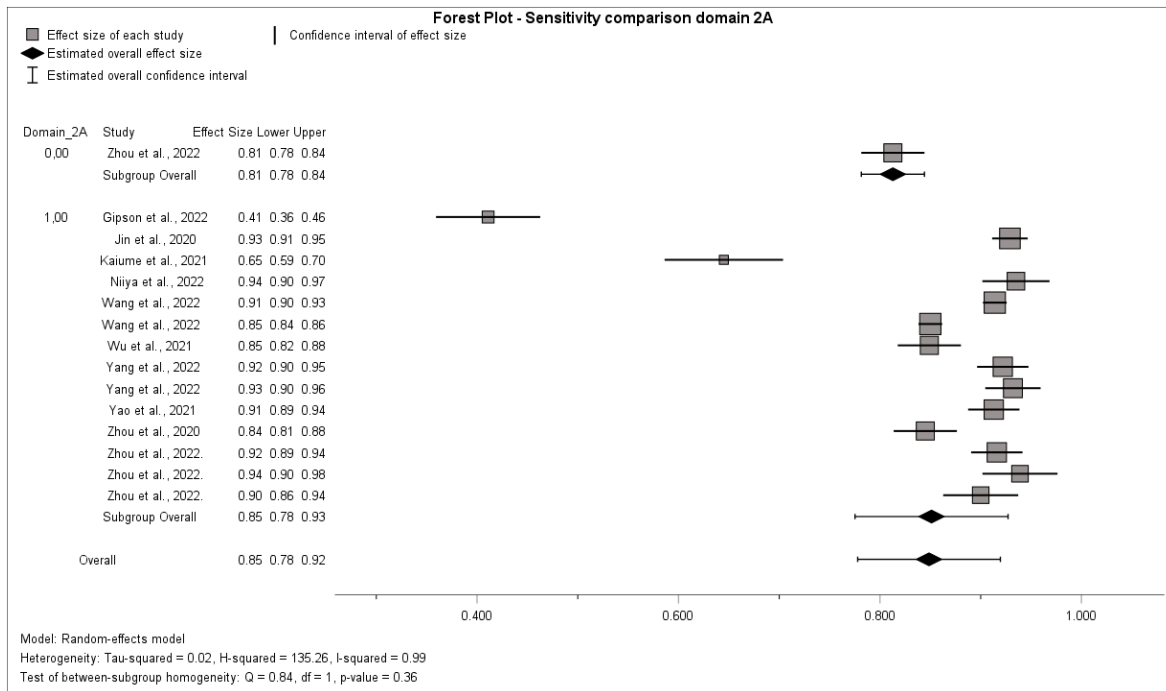

Figure S4.4: Forest plot of the sensitivity, comparison on domain 2B [18–28].

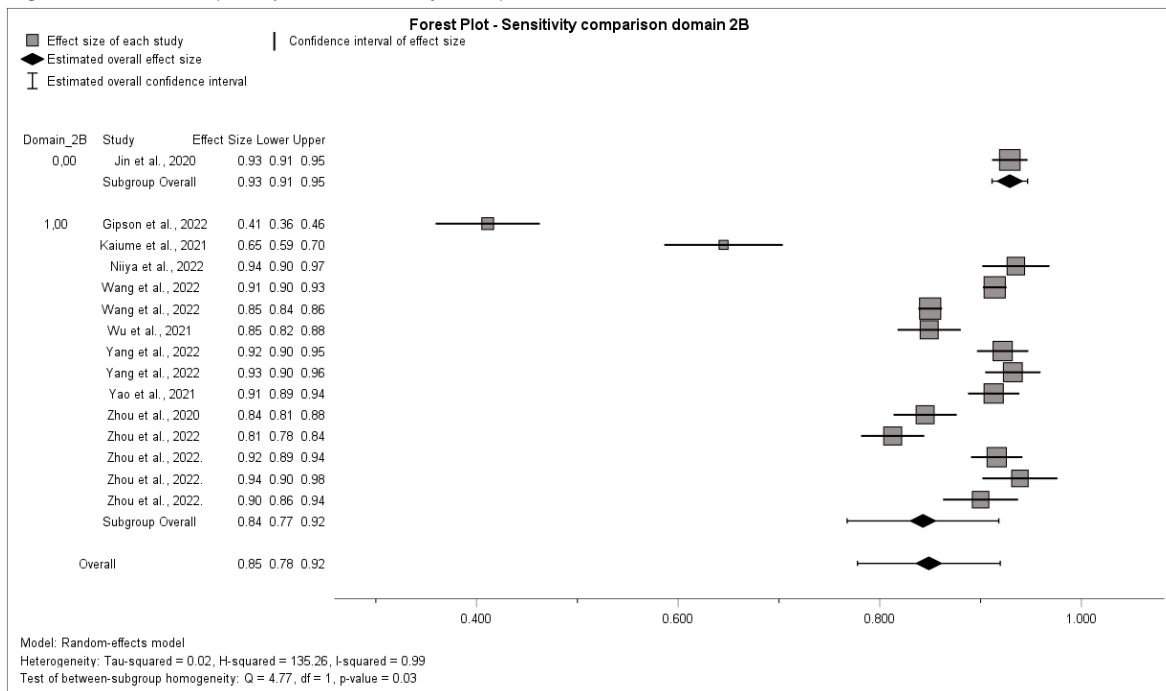

Figure S4.5: Forest plot of the sensitivity, comparison on domain 3A [18–28].

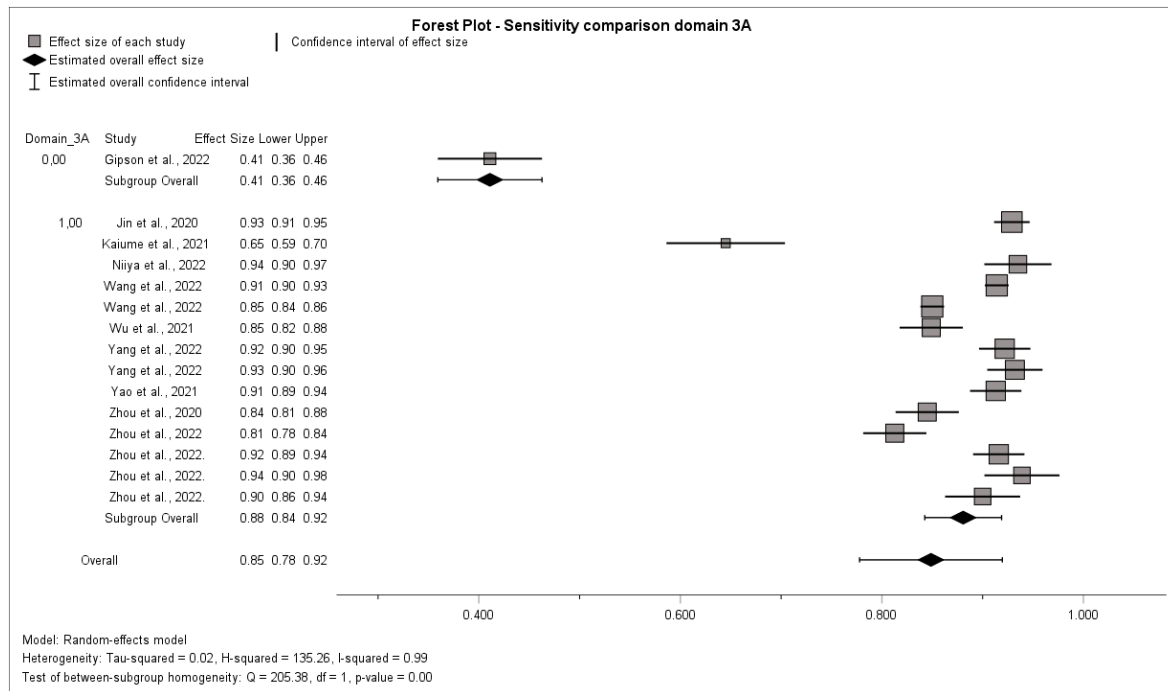

Figure S4.6: Forest plot of the sensitivity, comparison on domain 3B [18–28].

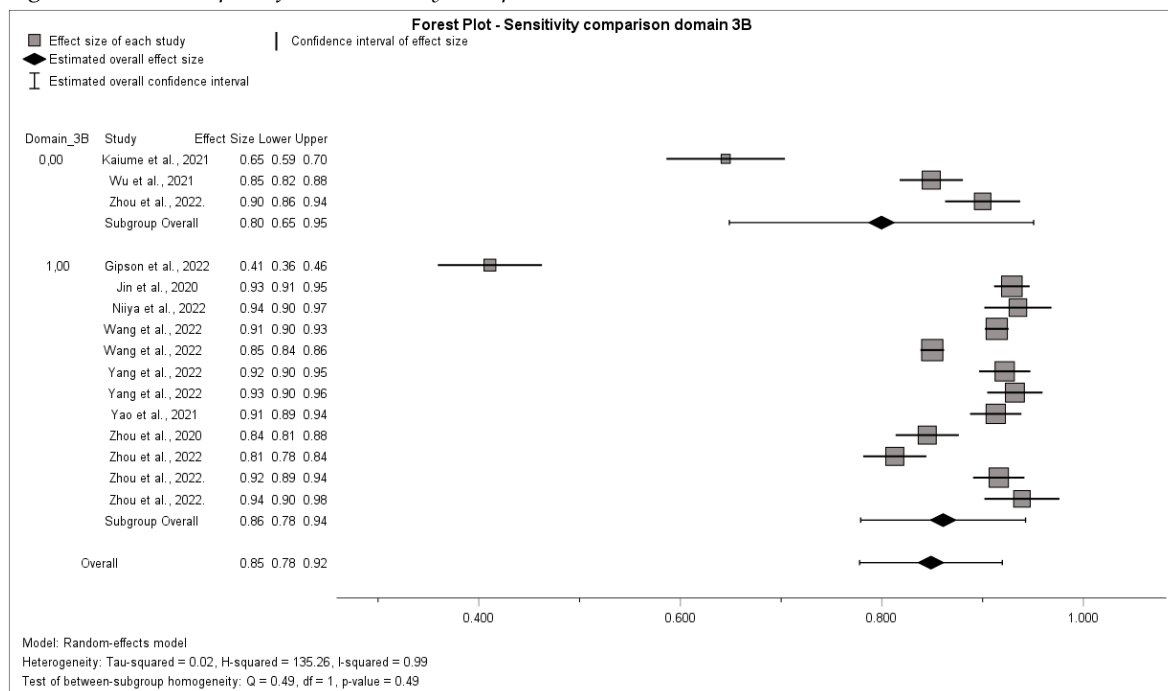

Figure S4.7: Forest plot of the sensitivity, comparison on domain 4 [18–28].

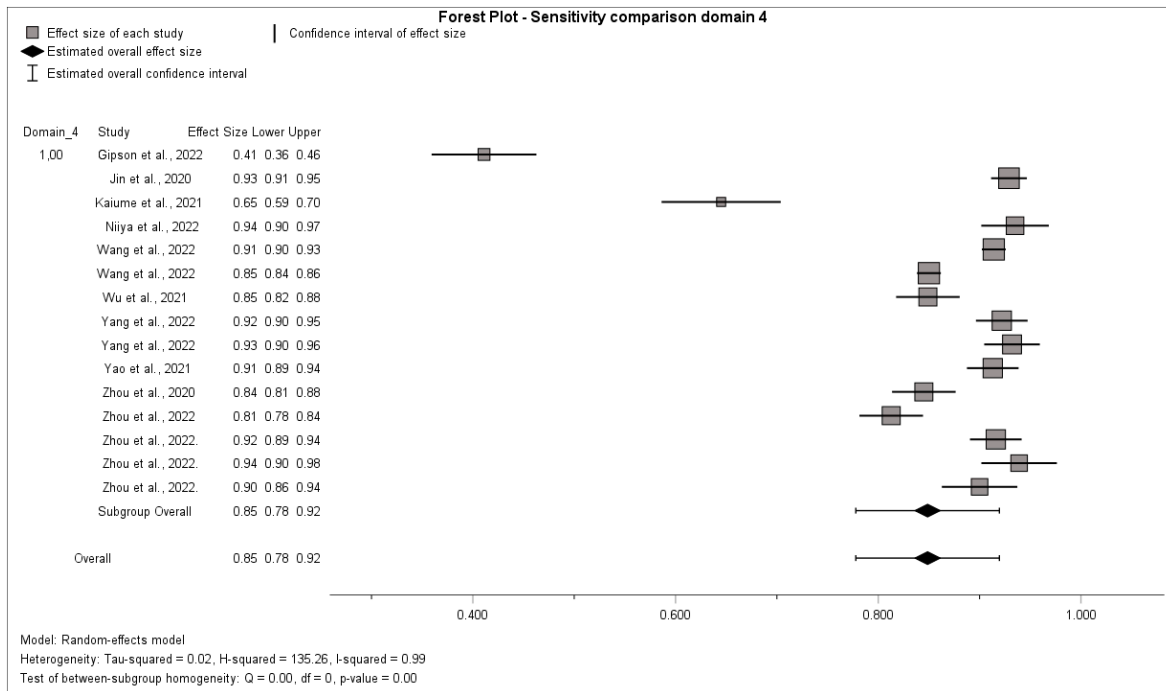

Figure S4.8: Forest plot of the specificity, comparison on domain 1A [19,21,22,24–26,28].

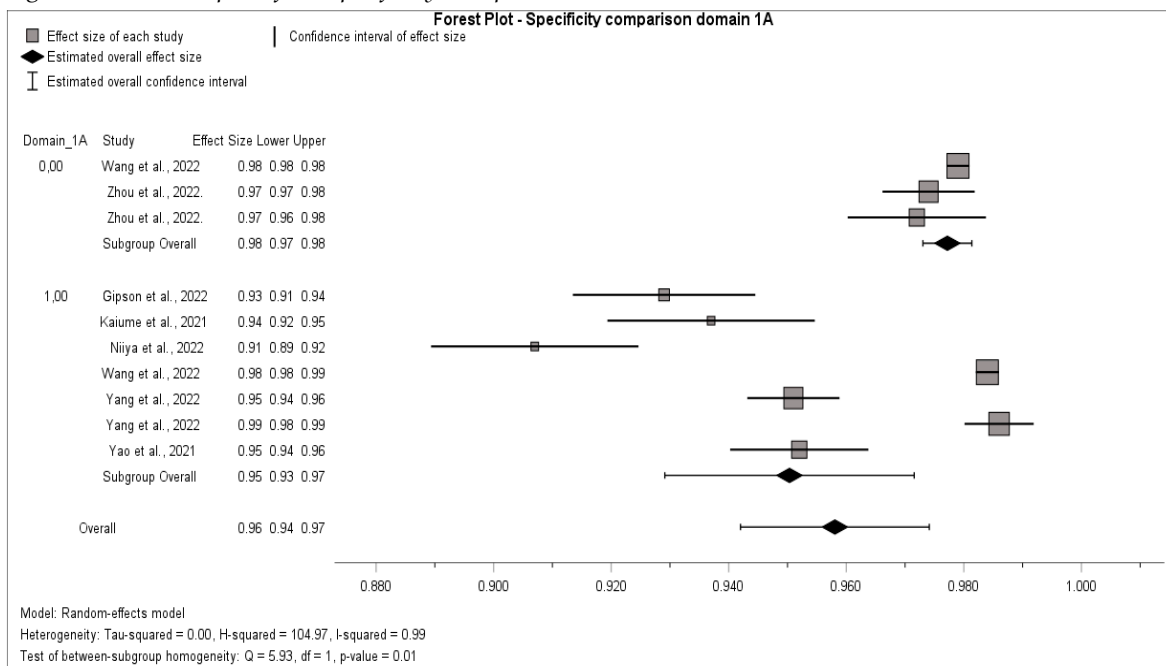

Figure S4.9: Forest plot of the specificity, comparison on domain 1B [19,21,22,24–26,28].

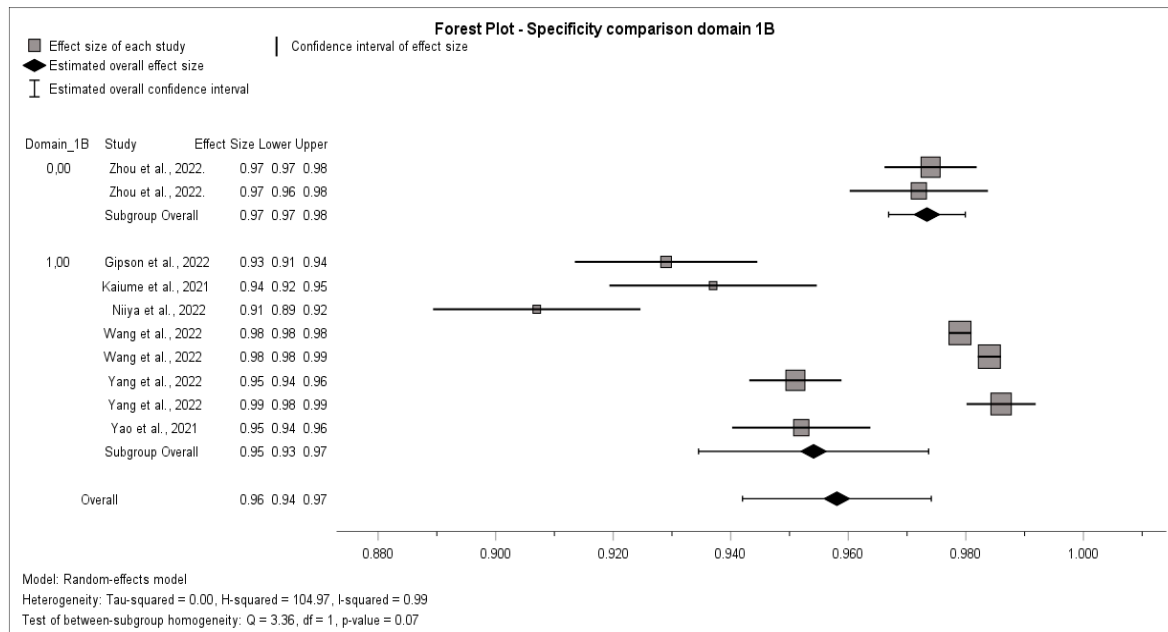

Figure S4.10: Forest plot of the specificity, comparison on domain 2A [19,21,22,24–26,28].

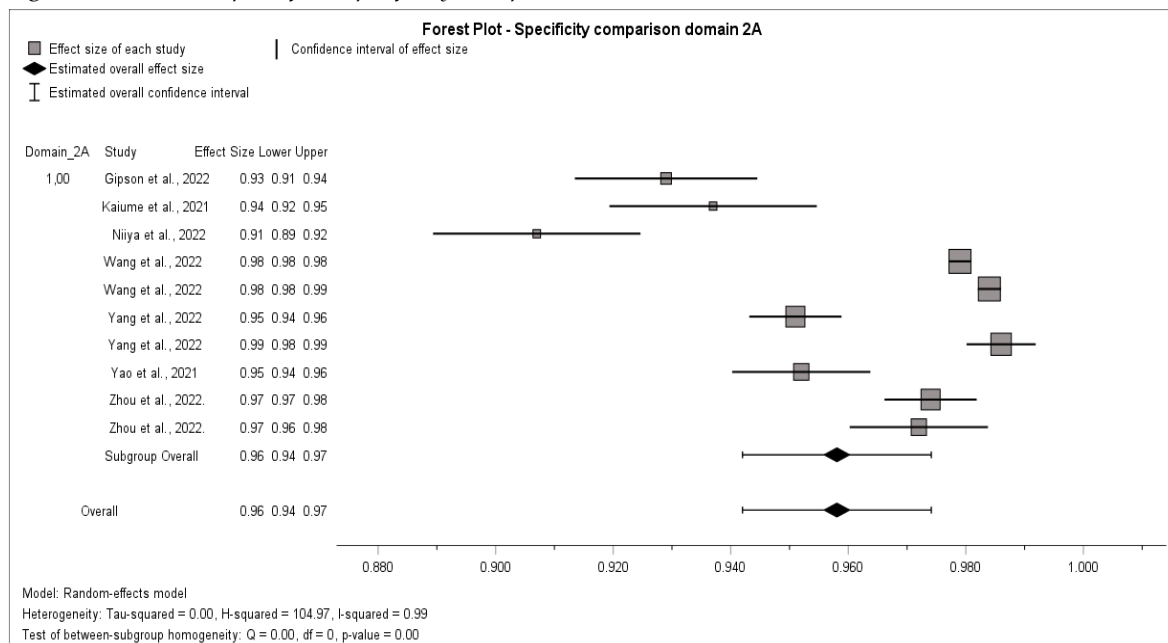

Figure S4.11: Forest plot of the specificity, comparison on domain 2B [19,21,22,24–26,28].

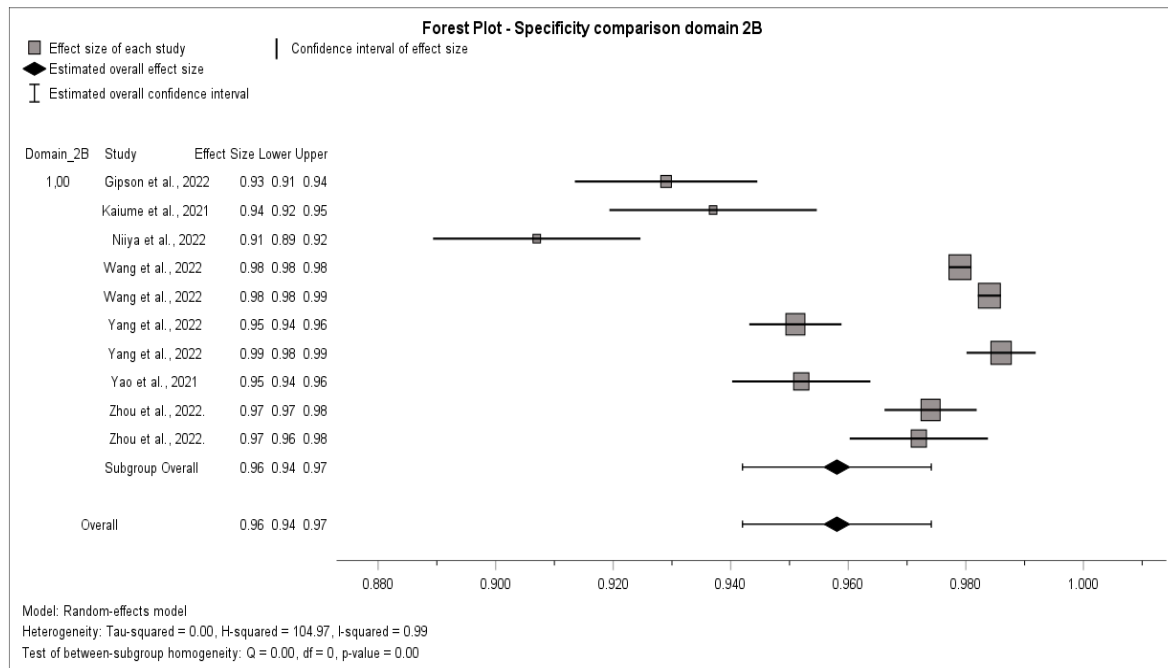

Figure S4.12: Forest plot of the specificity, comparison on domain 3A [19,21,22,24–26,28].

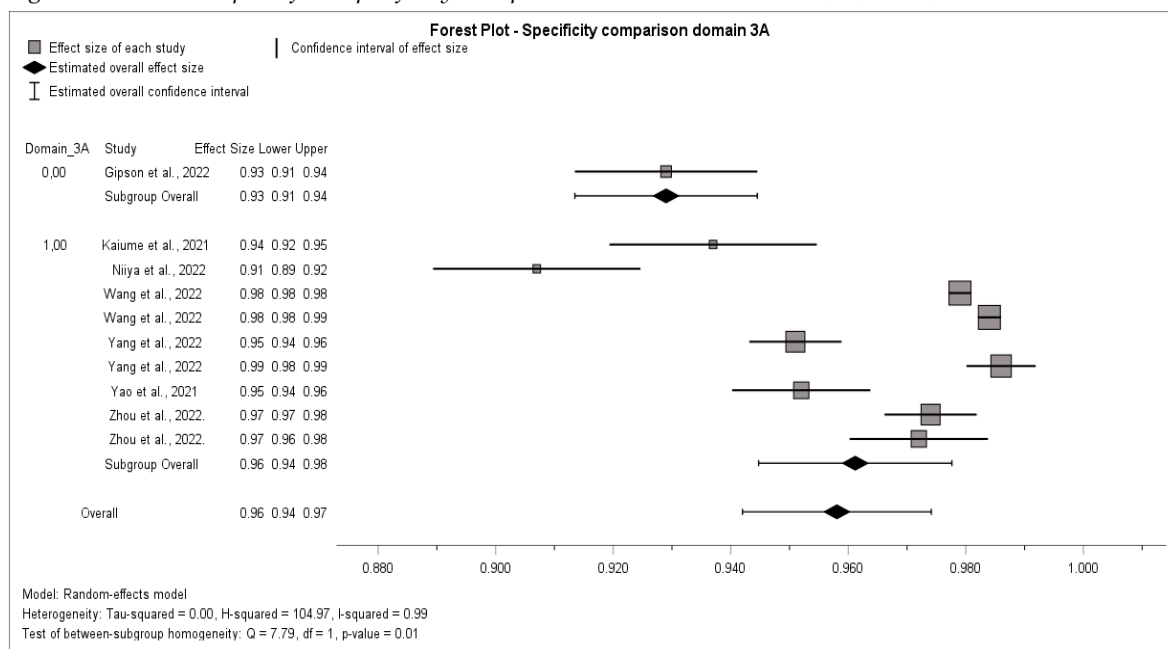

Figure S4.13: Forest plot of the specificity, comparison on domain 3B [19,21,22,24–26,28].

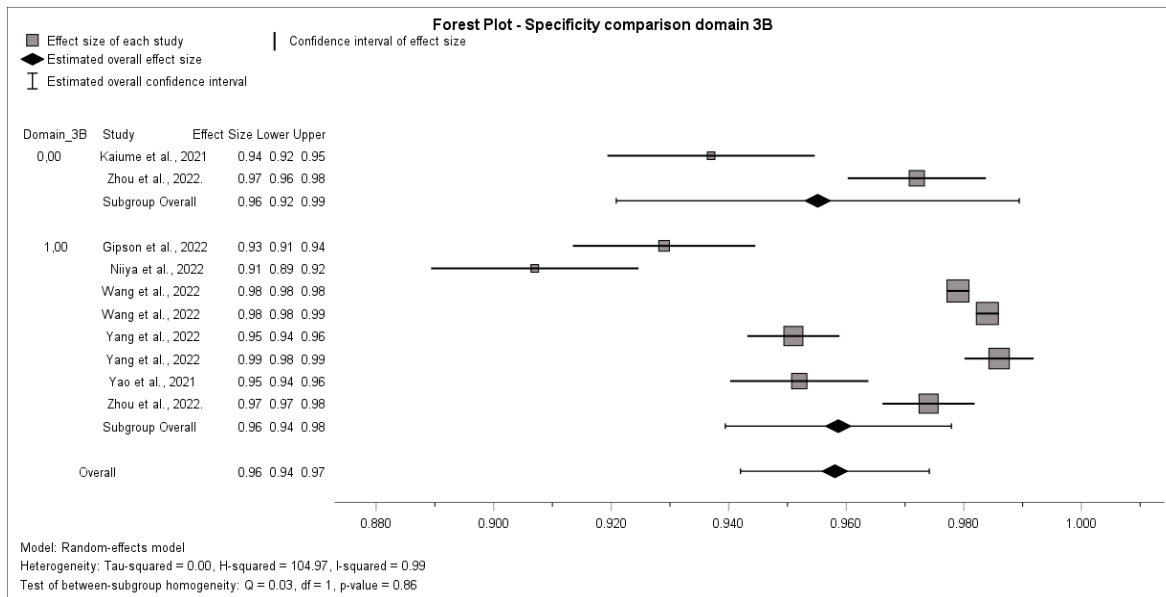

Figure S4.14: Forest plot of the specificity, comparison on domain 4 [19,21,22,24–26,28].

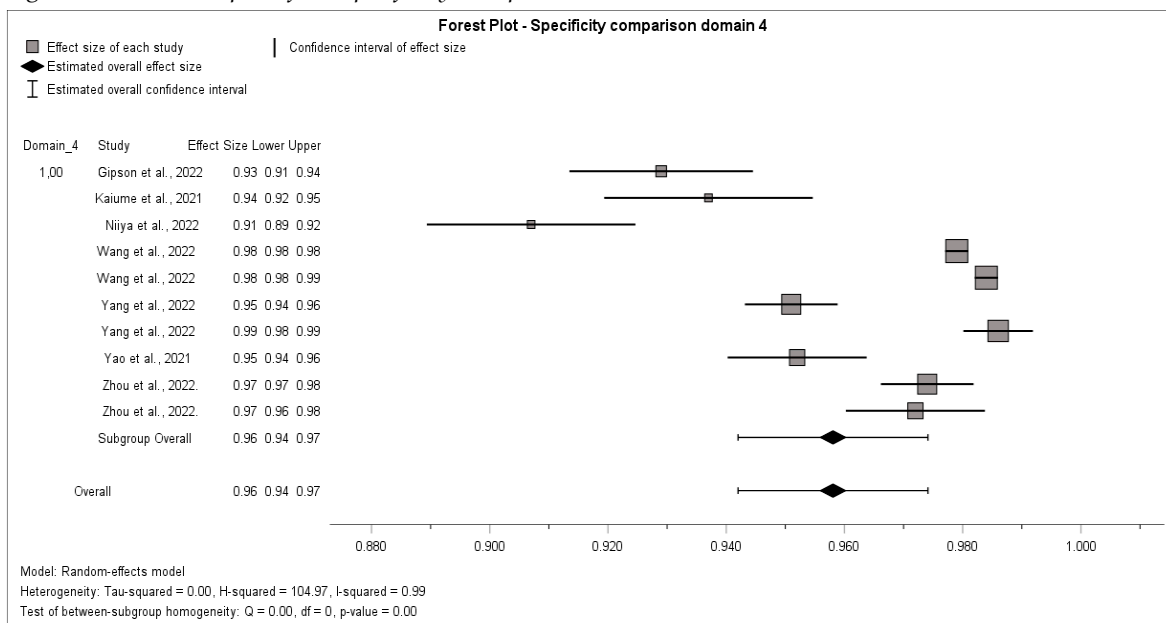

Figure S4.15: Forest plot of the sensitivity, comparison based on quality score [18–28].

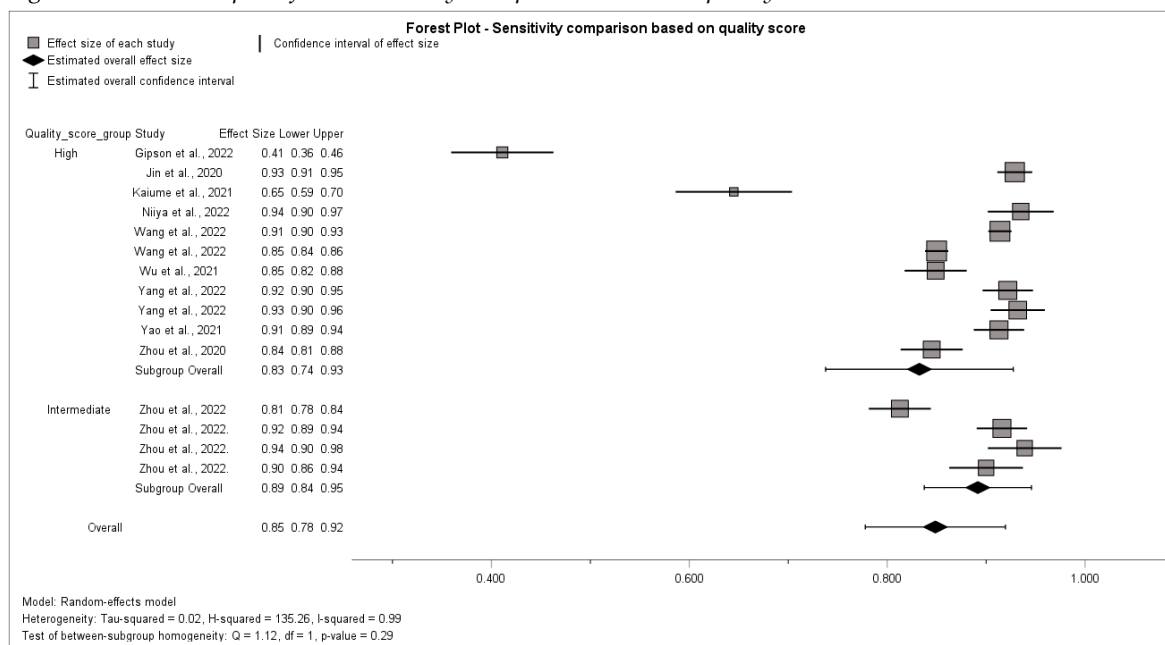

Supplement: s1 [file s1]
